# Supplementary material for: Assembly of miscible supramolecular network blends using DDA·AAD hydrogen-bonding interactions of pendent side-chains
Source: Royal Society of Chemistry journal article supplement (doi:10.1039/c9py01913h), 2020-01-01
Supplement: c9py01913h2.xlsx [file c9py01913h2.xlsx]

## Sheet: Sheet1
Polymer	HBM mol %	MMA mol %	HBM wt %	Mn	Mw	DP	no of H-bonds per chain	no of monomers
10	0	100		28000	32900	280	0	280			Wt MMA	100
11	2.5	97.5	2.78325	15100	20300	142.925	3.57312	139.352			Wt UIM-MMA	226
12	2	98	0.900398	39000	50200	373.134	7.46269	365.672
13	5.5	96	4.93254	19000	25200	166.769	9.1723	157.597
17	0	100	0	25600	34000	246.154	0	246.154
18	1.5	98.5	1.19788	16000	28300	148.451	2.22676	146.224
19	2	98	2.79012	8100	16200	74.2847	1.48569	72.799			Wt Sty	104
20	5	95	6.80723	8100	16600	69.4683	3.47341	65.9949			Wt AIC-St	252
21	5.5	94.5	5.97596	11400	20800	96.7249	5.31987	91.4051
ADA-MMA	14	86	15.874	15100	19932	87.2832	12.2197	75.0636			Wt MMA	100
DAD-PS	6	94	4.82906	21600	28080	174.137	10.4482	163.689			Wt PUPY-MMA	159
											Wt Sty	104
											Wt DAP-St	334
